# Supplementary material
Source: MDPI journal article supplement (https://www.mdpi.com/2624-8549/5/4/162)
Supplement: s1 [file s1]

# Synthesis, Characterization, and Photophysical Properties of Mixed Ligand ( $\eta^3$ -Allyl)palladium(II) Complexes with N,N' Aromatic Diimines

Antonia Garypidou <sup>1</sup>, Konstantinos Ypsilantis <sup>1</sup>, Evaggelia Sifnaiou <sup>1</sup>, Maria Manthou <sup>1</sup>, Dimitris Thomos <sup>1</sup>, John C. Plakatouras <sup>1,2</sup>, Theodoros Tsolis <sup>1</sup> and Achilleas Garoufis <sup>1,2,\*</sup>

<sup>1</sup> Department of Chemistry, University of Ioannina, GR-45110 Ioannina, Greece; a.garypidou@uoi.gr (A.G.); k\_ypsilantis@yahoo.gr (K.Y.); e.sifnaiou@uoi.gr (E.S.); maria.manthou13@gmail.com (M.M.); d.thomos@uoi.gr (D.T.); iplakatu@uoi.gr (J.C.P.); t.tsolis@uoi.gr (T.T.)

<sup>2</sup> Institute of Materials Science and Computing, University Research Center of Ioannina (URCI), GR-45110 Ioannina, Greece

\* Correspondence: agaroufi@uoi.gr

## Table of contents

**Figure S1:** <sup>1</sup>H NMR spectrum of the complex [Pd( $\eta^3$ -allyl)Cl]<sub>2</sub> in CDCl<sub>3</sub> at 298K.

**Figure S2:** <sup>13</sup>C NMR spectrum of the complex [Pd( $\eta^3$ -allyl)Cl]<sub>2</sub> in CDCl<sub>3</sub> at 298K.

**Figure S3:** <sup>1</sup>H NMR spectrum of the complex [Pd( $\eta^3$ -allyl)(bphen)](PF<sub>6</sub>) (**1**) in acetone-d<sub>6</sub> at 298K.

**Figure S4:** <sup>1</sup>H NMR spectrum of the complex [Pd( $\eta^3$ -allyl)(ncp)](PF<sub>6</sub>) (**2**) in acetone-d<sub>6</sub> at 298K.

**Figure S5:** <sup>1</sup>H NMR spectrum of the complex [Pd( $\eta^3$ -allyl)(bcp)](PF<sub>6</sub>) (**3**) in acetone-d<sub>6</sub> at 298K.

**Figure S6:** <sup>1</sup>H NMR spectrum of the complex [Pd( $\eta^3$ -allyl)(mphen)](PF<sub>6</sub>) (**4**) in acetone-d<sub>6</sub> at 298K.

**Figure S7:** <sup>1</sup>H NMR spectrum of the complex [Pd( $\eta^3$ -allyl)(tmphen)](PF<sub>6</sub>) (**5**) in acetone-d<sub>6</sub> at 298K.

**Figure S8:** <sup>1</sup>H NMR spectrum of the complex [Pd( $\eta^3$ -allyl)(pqx)](PF<sub>6</sub>) (**6**) in acetone-d<sub>6</sub> (a) and [Pd( $\eta^3$ -allyl)(pqx)][Pd( $\eta^3$ -allyl)Cl<sub>2</sub>] (**6a**) in MeOD (b) at 298K.

**Figure S9:** HR-ESI-MS of the complex [Pd( $\eta^3$ -allyl)(bphen)](PF<sub>6</sub>) (**1**) in acetone.

**Figure S10:** HR-ESI-MS of the complex [Pd( $\eta^3$ -allyl)(ncp)](PF<sub>6</sub>) (**2**) in acetone.

**Figure S11:** HR-ESI-MS of the complex [Pd( $\eta^3$ -allyl)(bcp)](PF<sub>6</sub>) (**3**) in acetone.

**Figure S12:** HR-ESI-MS of the complex [Pd( $\eta^3$ -allyl)(mphen)](PF<sub>6</sub>) (**4**) in acetone.

**Figure S13:** HR-ESI-MS of the complex [Pd( $\eta^3$ -allyl)(tmphen)](PF<sub>6</sub>) (**5**) in acetone.

**Figure S14:** HR-ESI-MS of the complex [Pd( $\eta^3$ -allyl)(pqx)](PF<sub>6</sub>) (**6**) in acetone.

**Figure S15:** <sup>13</sup>C NMR spectrum of the complex [Pd( $\eta^3$ -allyl)(mphen)](PF<sub>6</sub>) (**4**) in acetone-d<sub>6</sub> at 298K.

**Figure S16:** <sup>13</sup>C NMR spectrum of the complex [Pd( $\eta^3$ -allyl)(tmphen)](PF<sub>6</sub>) (**5**) in acetone-d<sub>6</sub> at 298K.

**Figure S17:** <sup>13</sup>C NMR spectrum of the complex [Pd( $\eta^3$ -allyl)(pqx)][Pd( $\eta^3$ -allyl)Cl<sub>2</sub>] (**6a**) in MeOD at 298K.

**Figure S18:** A packing diagram of compound  $[\text{Pd}(\eta^3\text{-allyl})(\text{pqx})](\text{PF}_6)$  (**6**), down to the  $b$  axis of the unit cell. Hydrogen atoms of the allyl group have been omitted for clarity.

**Figure S19:** A packing diagram of compound  $[\text{Pd}(\eta^3\text{-allyl})(\text{pqx})][\text{Pd}(\eta^3\text{-allyl})\text{Cl}_2]$  (**6a**), down to the  $a$  axis of the unit cell.

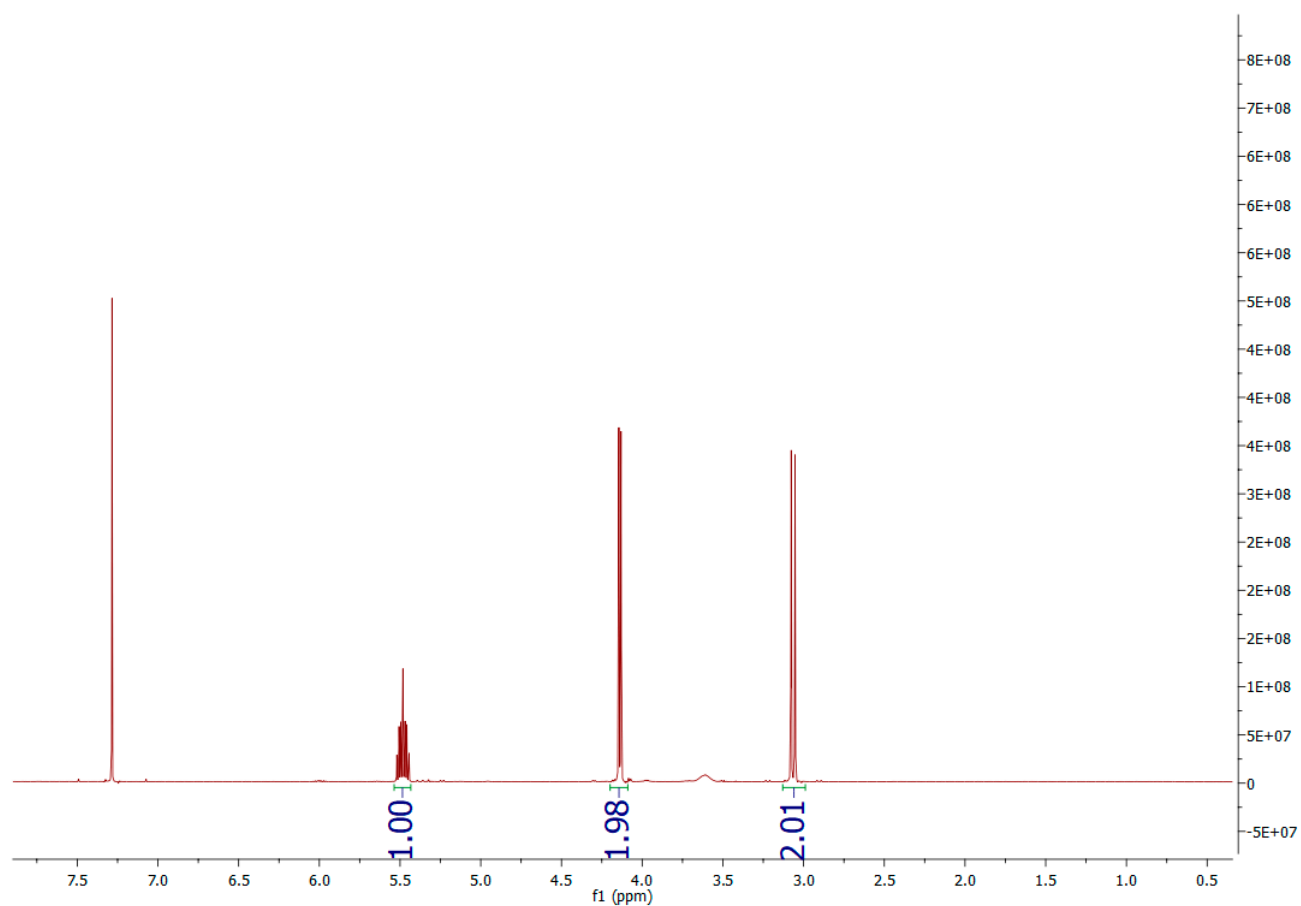

**Figure S1:**  $^1\text{H}$  NMR spectrum of the complex  $[\text{Pd}(\eta^3\text{-allyl})\text{Cl}]_2$  in  $\text{CDCl}_3$  at 298K.

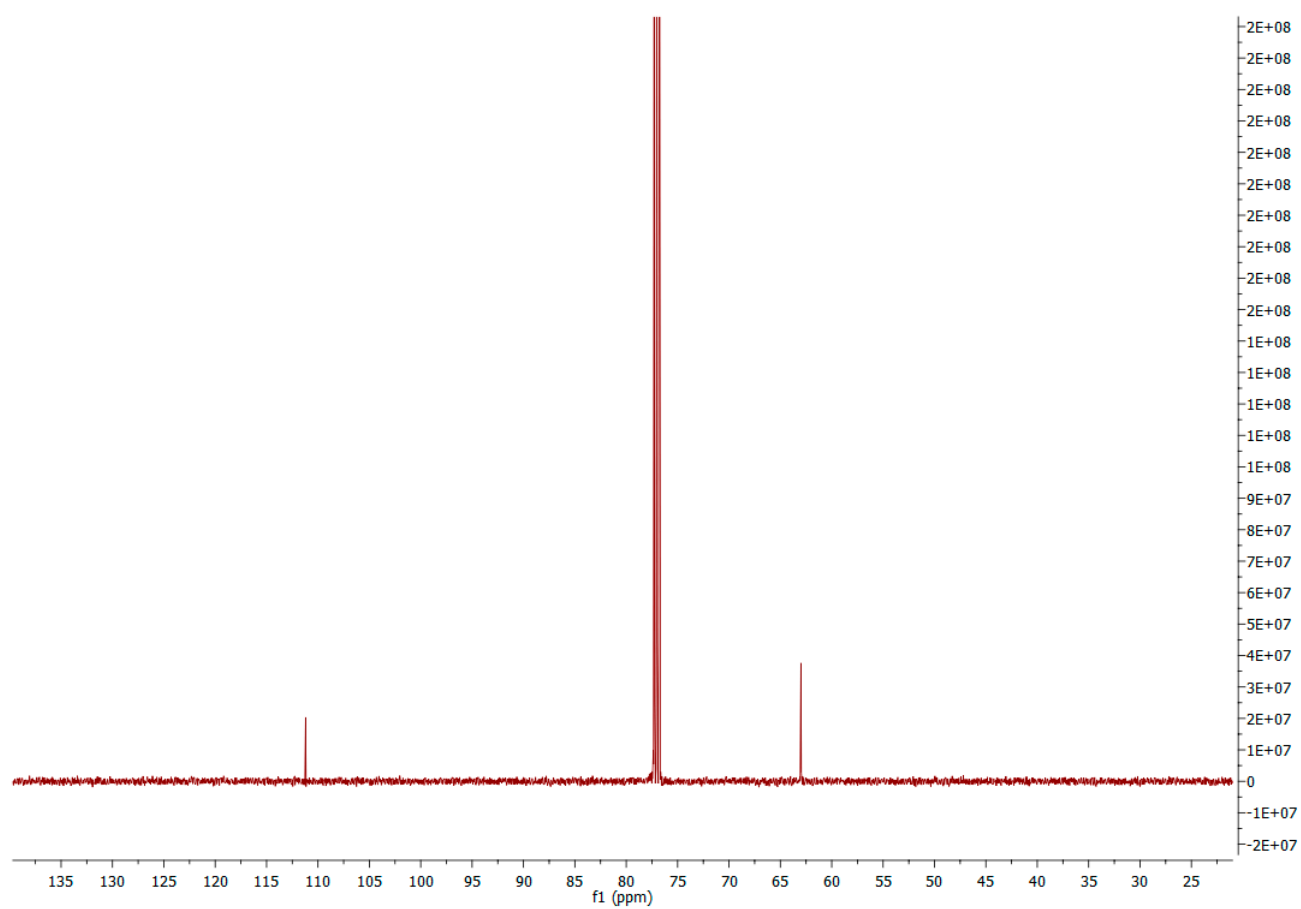

**Figure S2:**  $^{13}\text{C}$  NMR spectrum of the complex  $[\text{Pd}(\eta^3\text{-allyl})\text{Cl}]_2$  in  $\text{CDCl}_3$  at 298K.

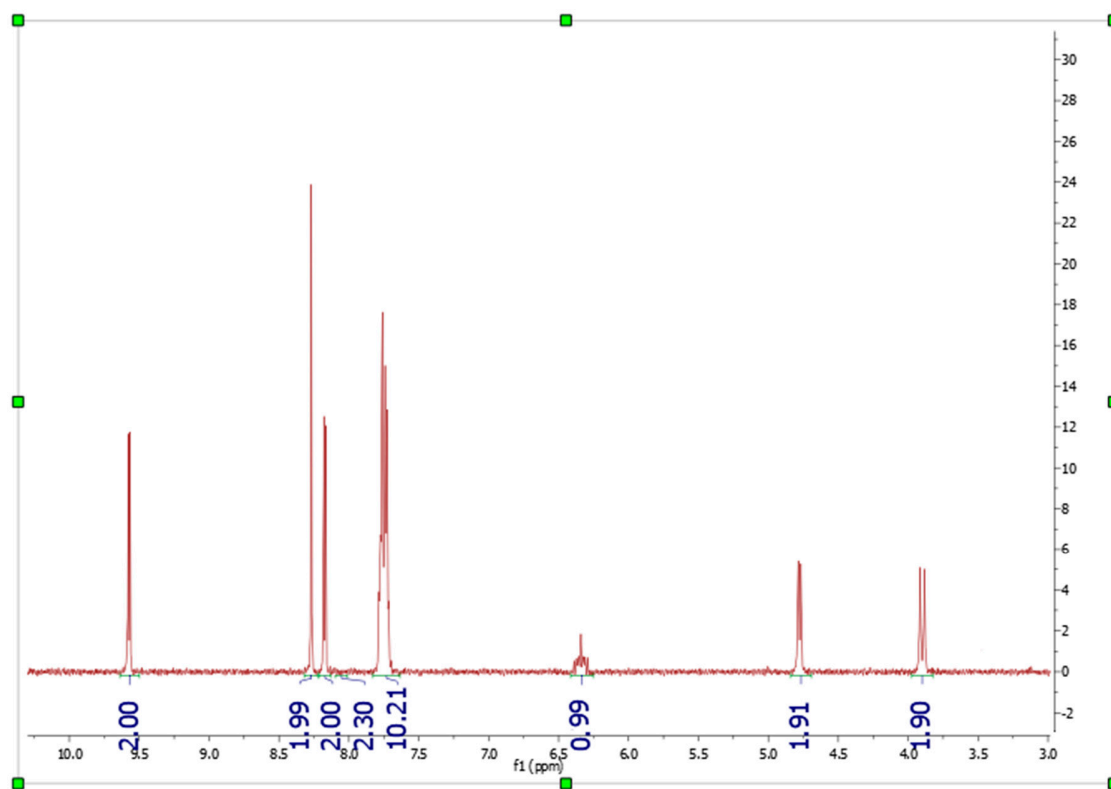

**Figure S3:**  $^1\text{H}$  NMR spectrum of the complex  $[\text{Pd}(\eta^3\text{-allyl})(\text{bphen})](\text{PF}_6)$  (1) in acetone- $\text{d}_6$  at 298K.

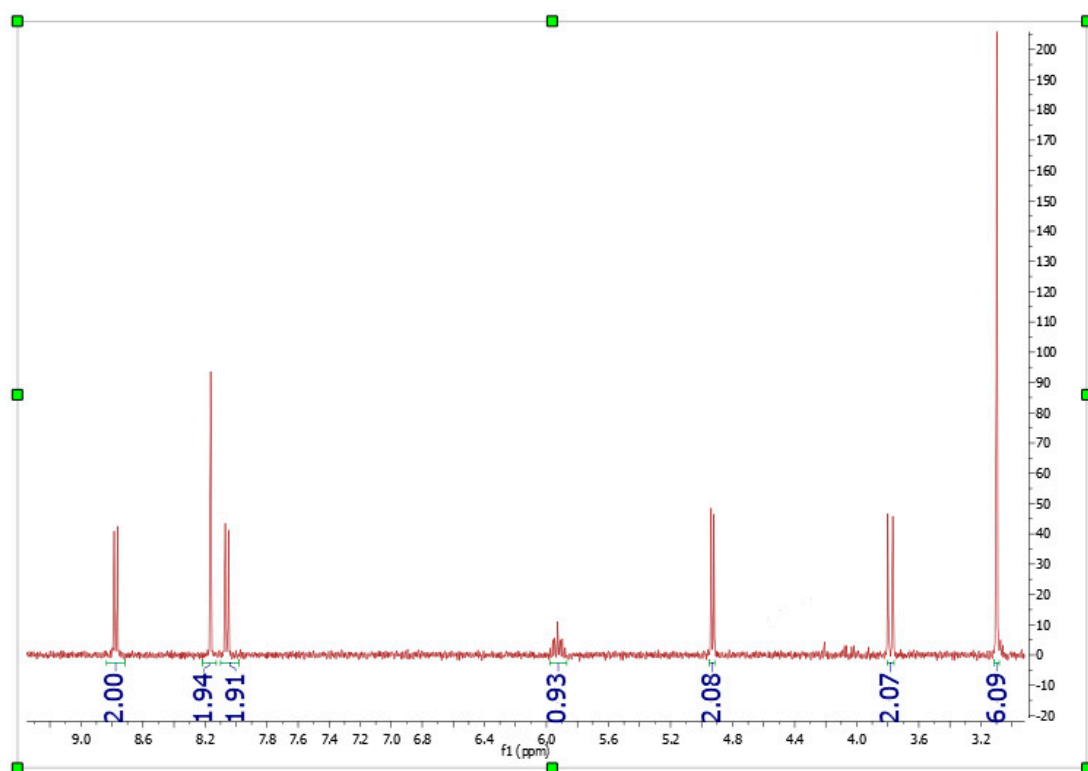

**Figure S4:**  $^1\text{H}$  NMR spectrum of the complex  $[\text{Pd}(\eta^3\text{-allyl})(\text{ncp})](\text{PF}_6)$  (**2**) in acetone- $d_6$  at 298K.

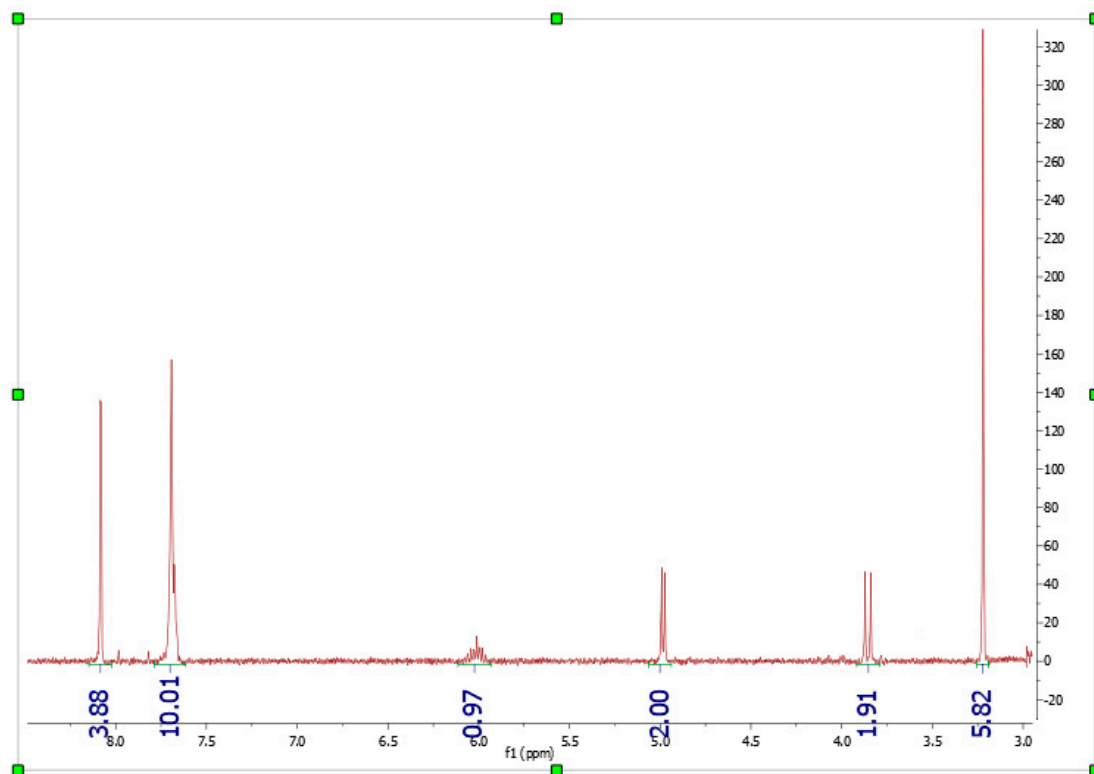

**Figure S5:**  $^1\text{H}$  NMR spectrum of the complex  $[\text{Pd}(\eta^3\text{-allyl})(\text{bcp})](\text{PF}_6)$  (**3**) in acetone- $\text{d}_6$  at 298K.

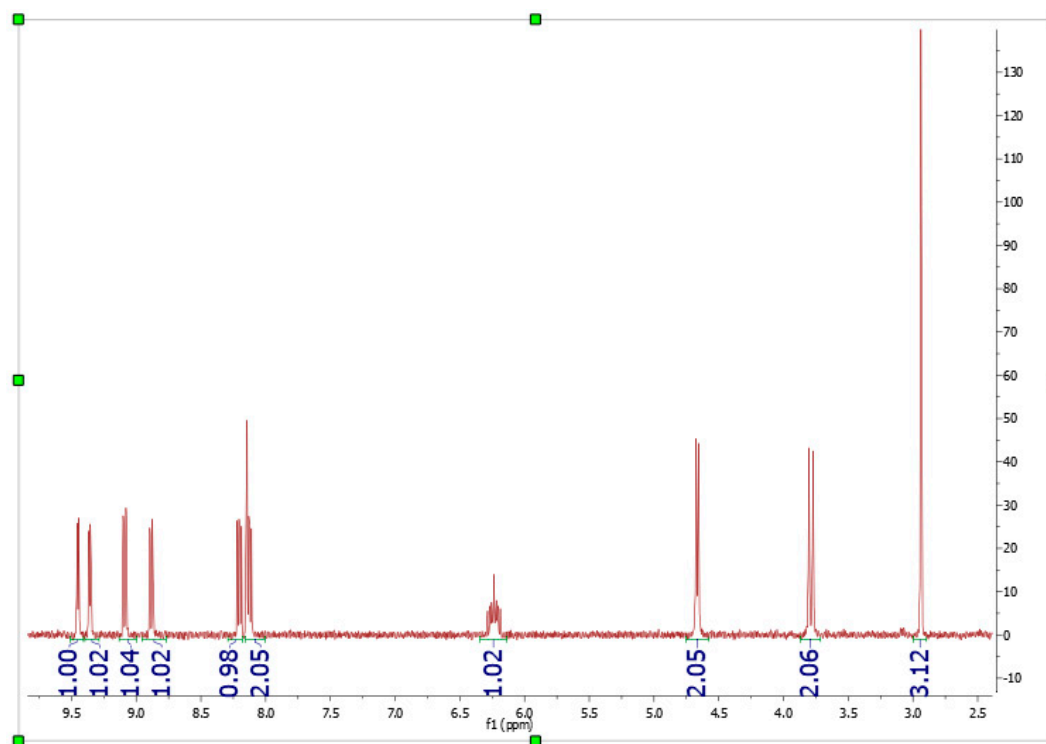

**Figure S6:**  $^1\text{H}$  NMR spectrum of the complex  $[\text{Pd}(\eta^3\text{-allyl})(\text{mphen})](\text{PF}_6)$  (**4**) in acetone- $\text{d}_6$  at 298K.

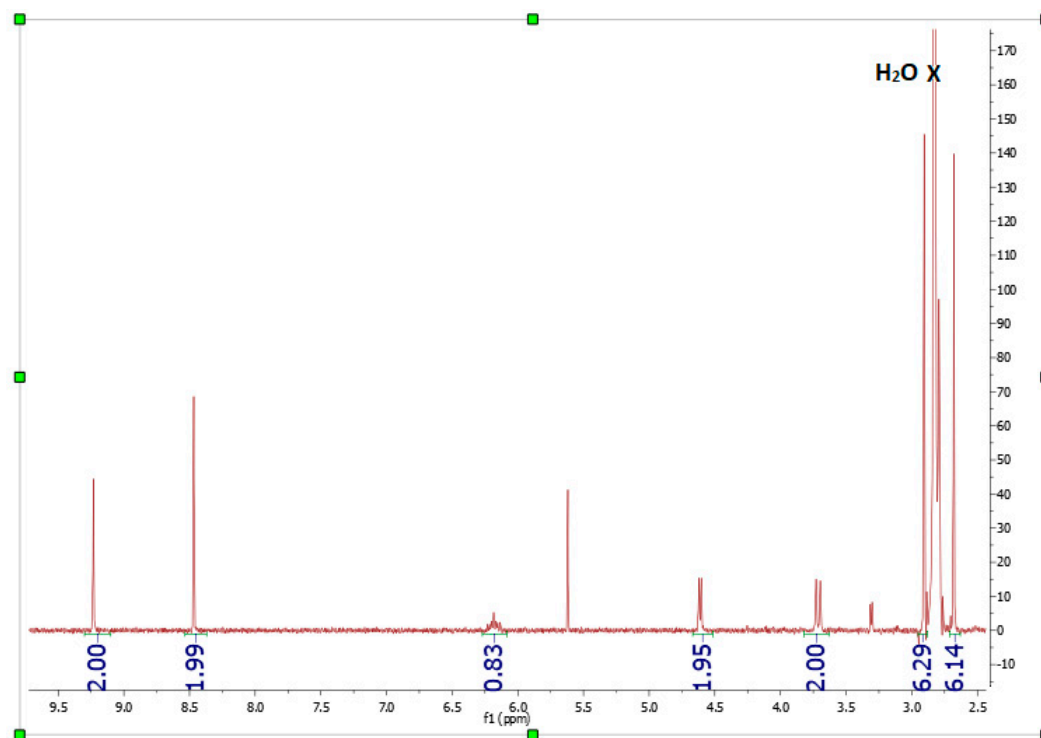

**Figure S7:**  $^1\text{H}$  NMR spectrum of the complex  $[\text{Pd}(\eta^3\text{-allyl})(\text{tmphen})](\text{PF}_6)$  (5) in acetone- $\text{d}_6$  at 298K.



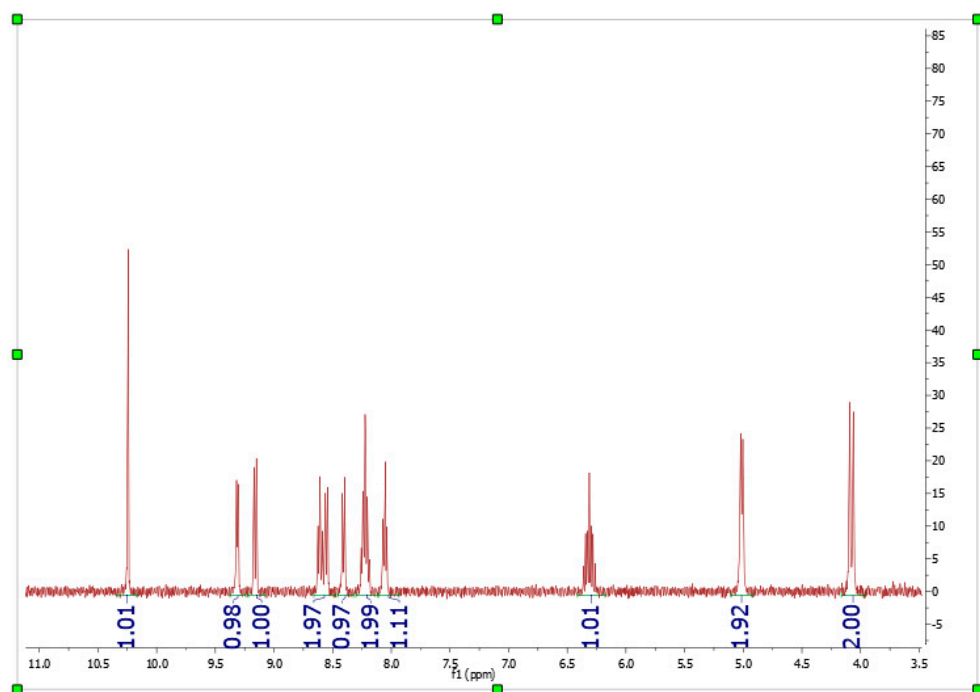

(a)

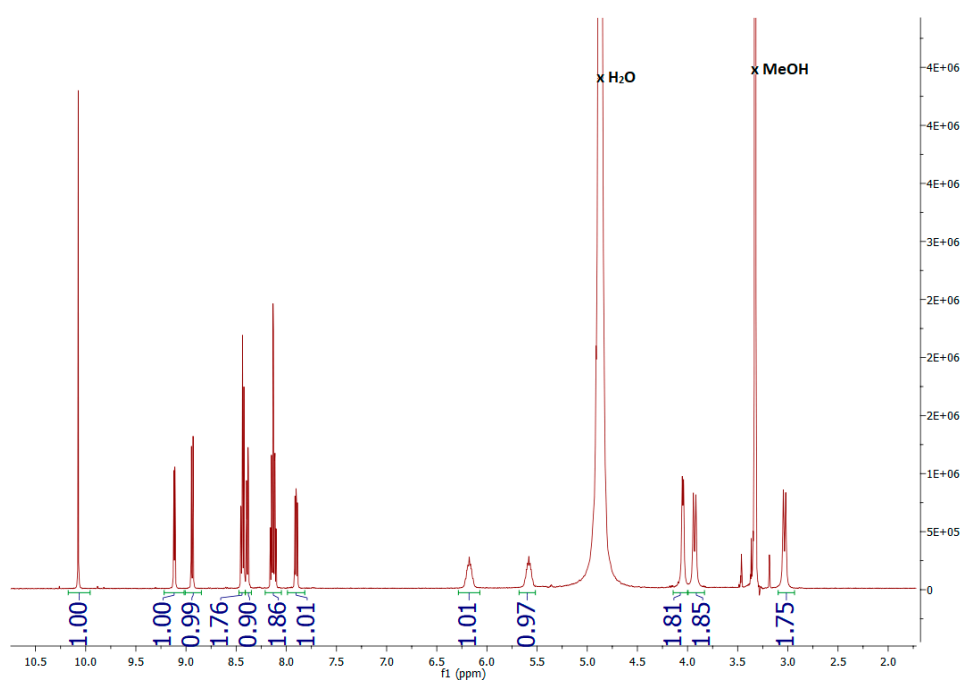

(b)

**Figure S8:**  $^1\text{H}$  NMR spectrum of the complex  $[\text{Pd}(\eta^3\text{-allyl})(\text{pqx})](\text{PF}_6)$  (**6**) in acetone- $\text{d}_6$  (a) and  $[\text{Pd}(\eta^3\text{-allyl})(\text{pqx})][\text{Pd}(\eta^3\text{-allyl})\text{Cl}_2]$  (**6a**) in MeOD (b) at 298K.

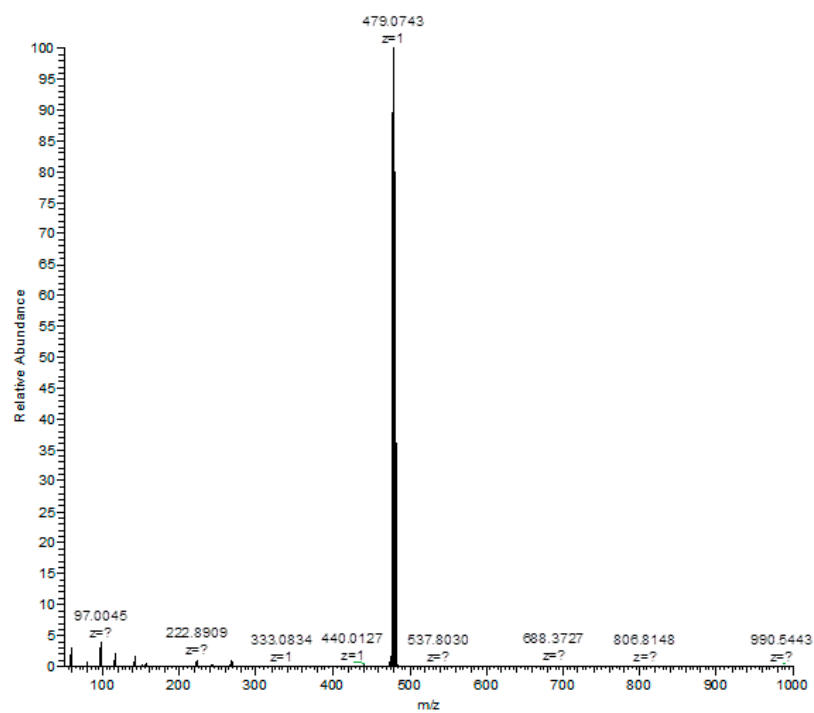

**Figure S9:** HR-ESI-MS of the complex  $[\text{Pd}(\eta^3\text{-allyl})(\text{bphen})](\text{PF}_6)$  (**1**) in acetone.

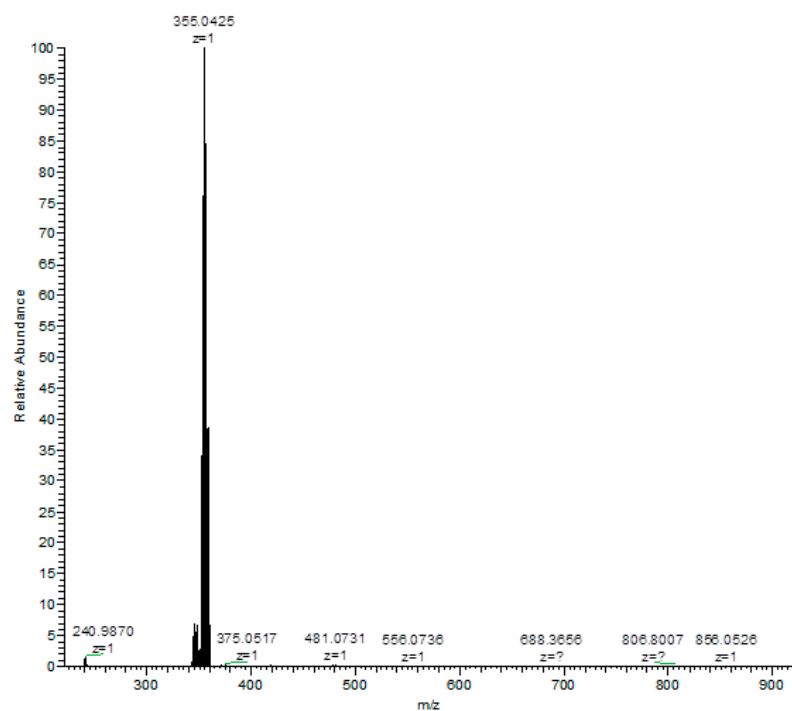

**Figure S10:** HR-ESI-MS of the complex  $[\text{Pd}(\eta^3\text{-allyl})(\text{ncp})](\text{PF}_6)$  (**2**) in acetone.

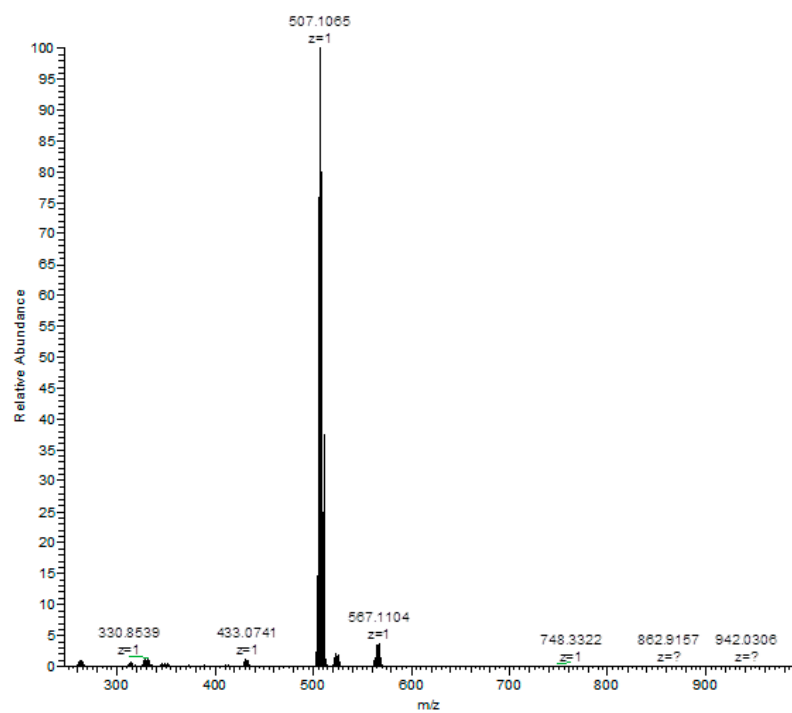

**Figure S11:** HR-ESI-MS of the complex  $[\text{Pd}(\eta^3\text{-allyl})(\text{bcp})](\text{PF}_6)$  (**3**) in acetone.

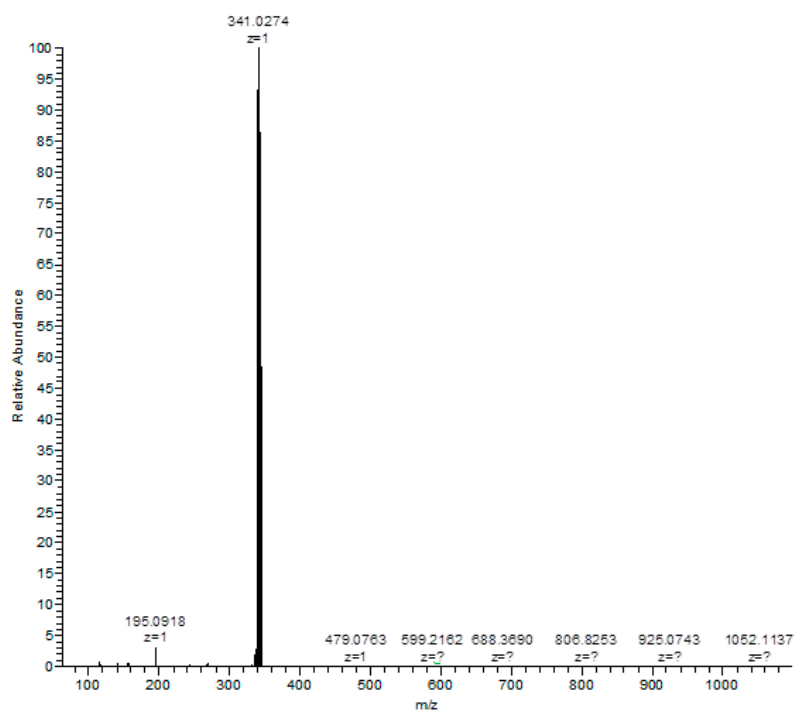

**Figure S12:** HR-ESI-MS of the complex  $[\text{Pd}(\eta^3\text{-allyl})(\text{mphen})](\text{PF}_6)$  (**4**) in acetone.

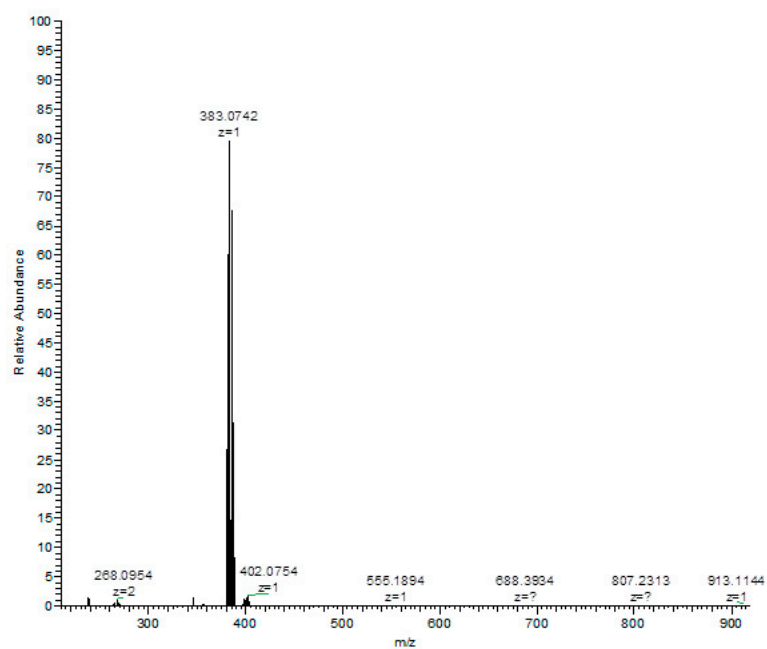

**Figure S13:** HR-ESI-MS of the complex  $[\text{Pd}(\eta^3\text{-allyl})(\text{tmphen})](\text{PF}_6)$  (**5**) in acetone.

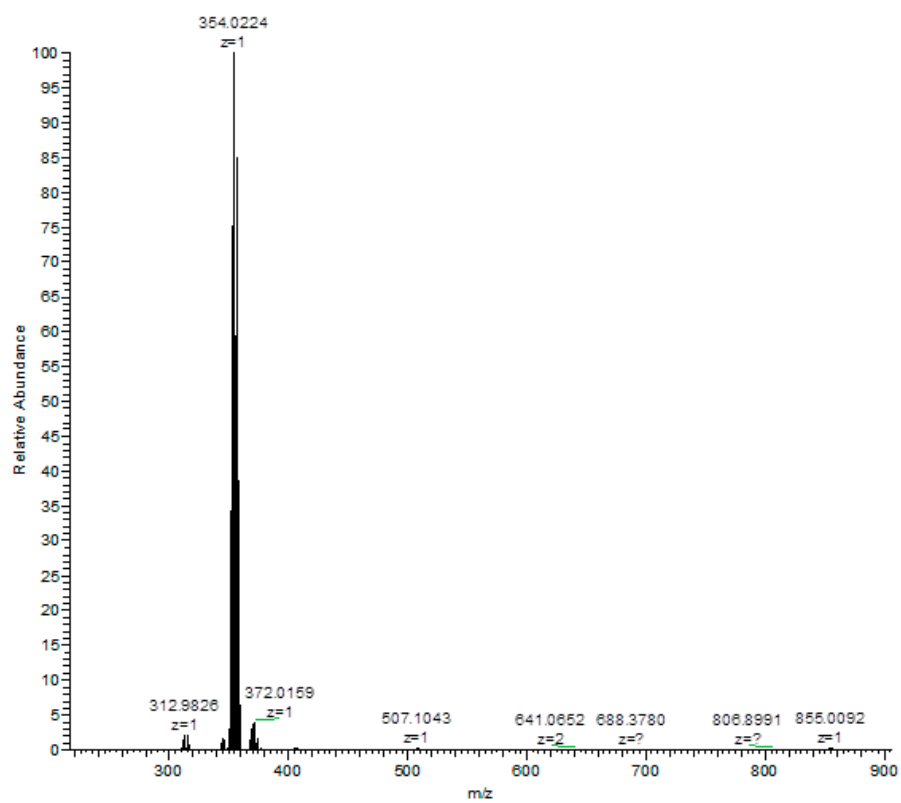

**Figure S14:** HR-ESI-MS of the complex  $[\text{Pd}(\eta^3\text{-allyl})(\text{pqx})](\text{PF}_6)$  (**6**) in acetone.

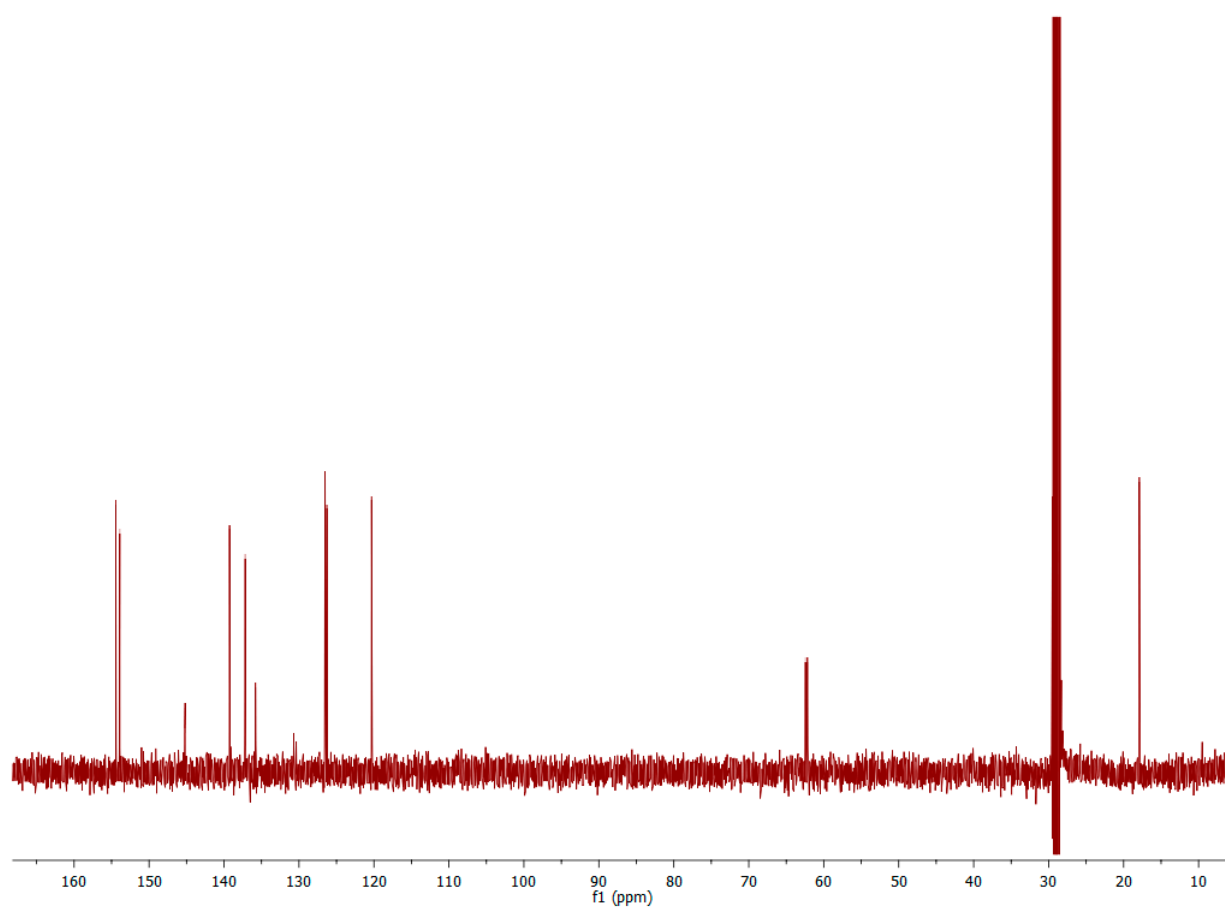

**Figure S15:**  $^{13}\text{C}$  NMR spectrum of the complex  $[\text{Pd}(\eta^3\text{-allyl})(\text{mphen})](\text{PF}_6)$  (**4**) in acetone- $\text{d}_6$  at 298K.

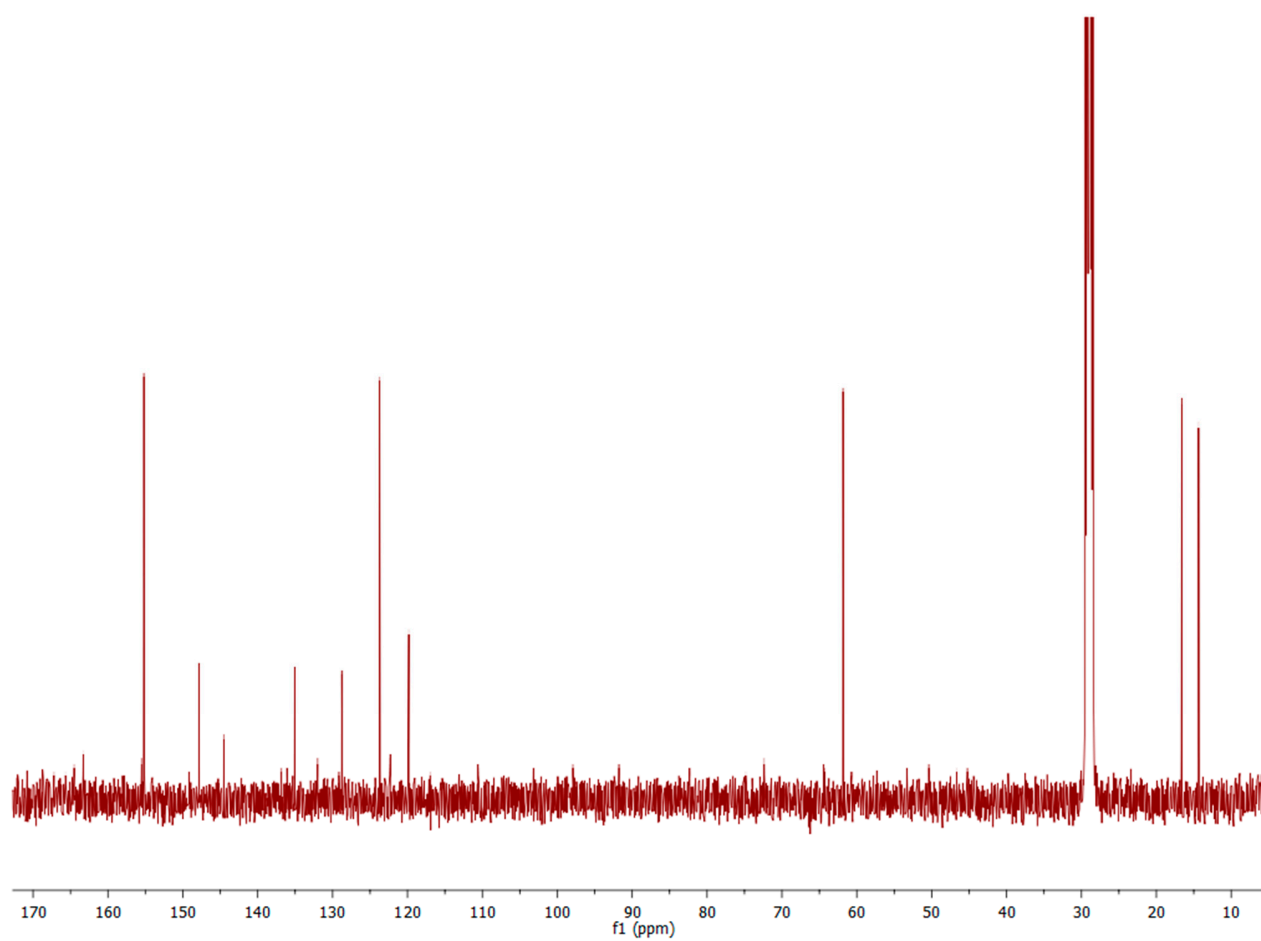

**Figure S16:**  $^{13}\text{C}$  NMR spectrum of the complex  $[\text{Pd}(\eta^3\text{-allyl})(\text{tmphen})](\text{PF}_6)$  (**5**) in acetone- $d_6$  at 298K.



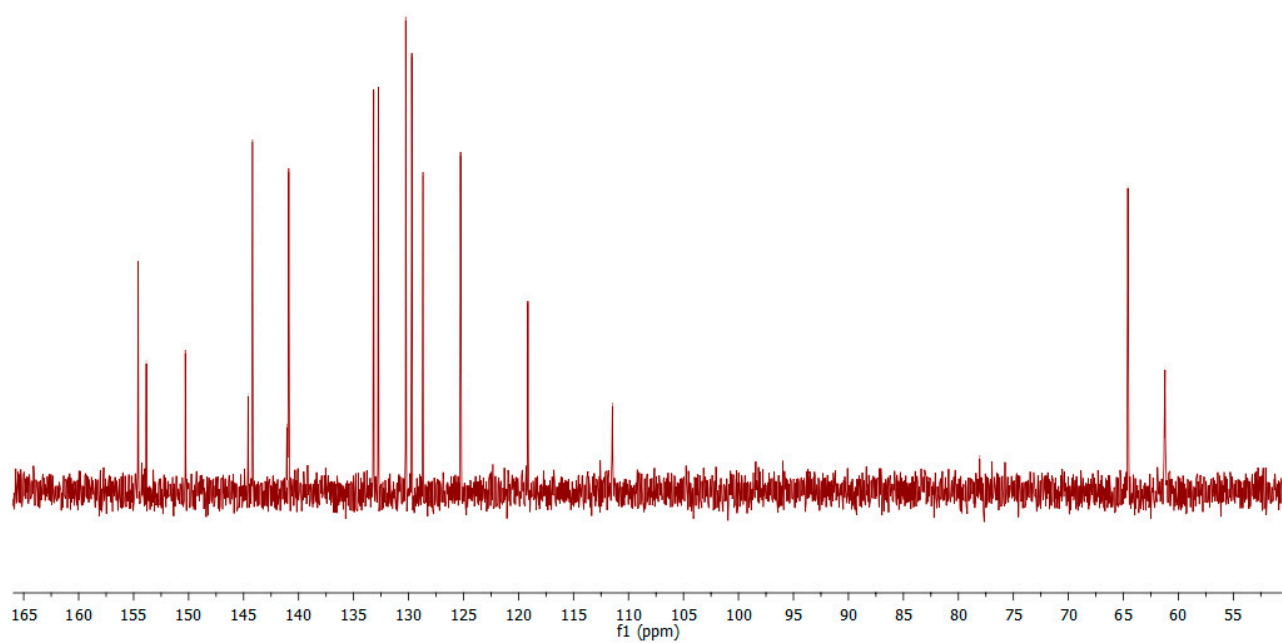

**Figure S17:**  $^{13}\text{C}$  NMR spectrum of the complex  $[\text{Pd}(\eta^3\text{-allyl})(\text{pqx})][\text{Pd}(\eta^3\text{-allyl})\text{Cl}_2]$  (6a) in  $\text{MeOD}$  at 298K.

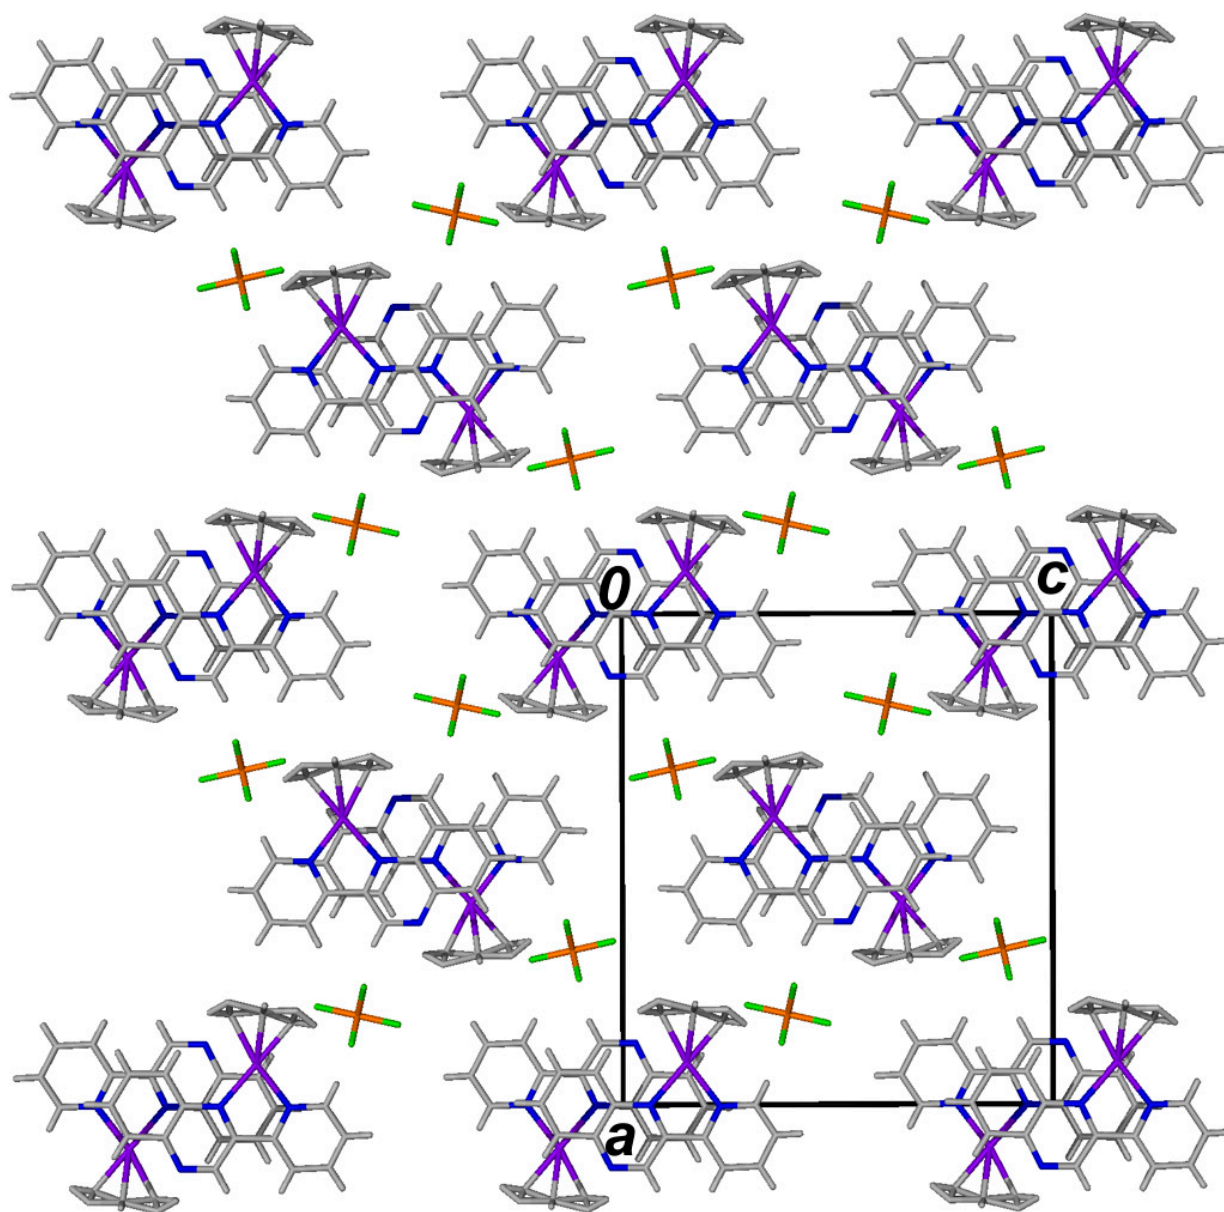

**Figure S18:** A packing diagram of compound  $[\text{Pd}(\eta^3\text{-allyl})(\text{pqx})](\text{PF}_6)$  (**6**), down to the  $b$  axis of the unit cell. Hydrogen atoms of the allyl group have been omitted for clarity.

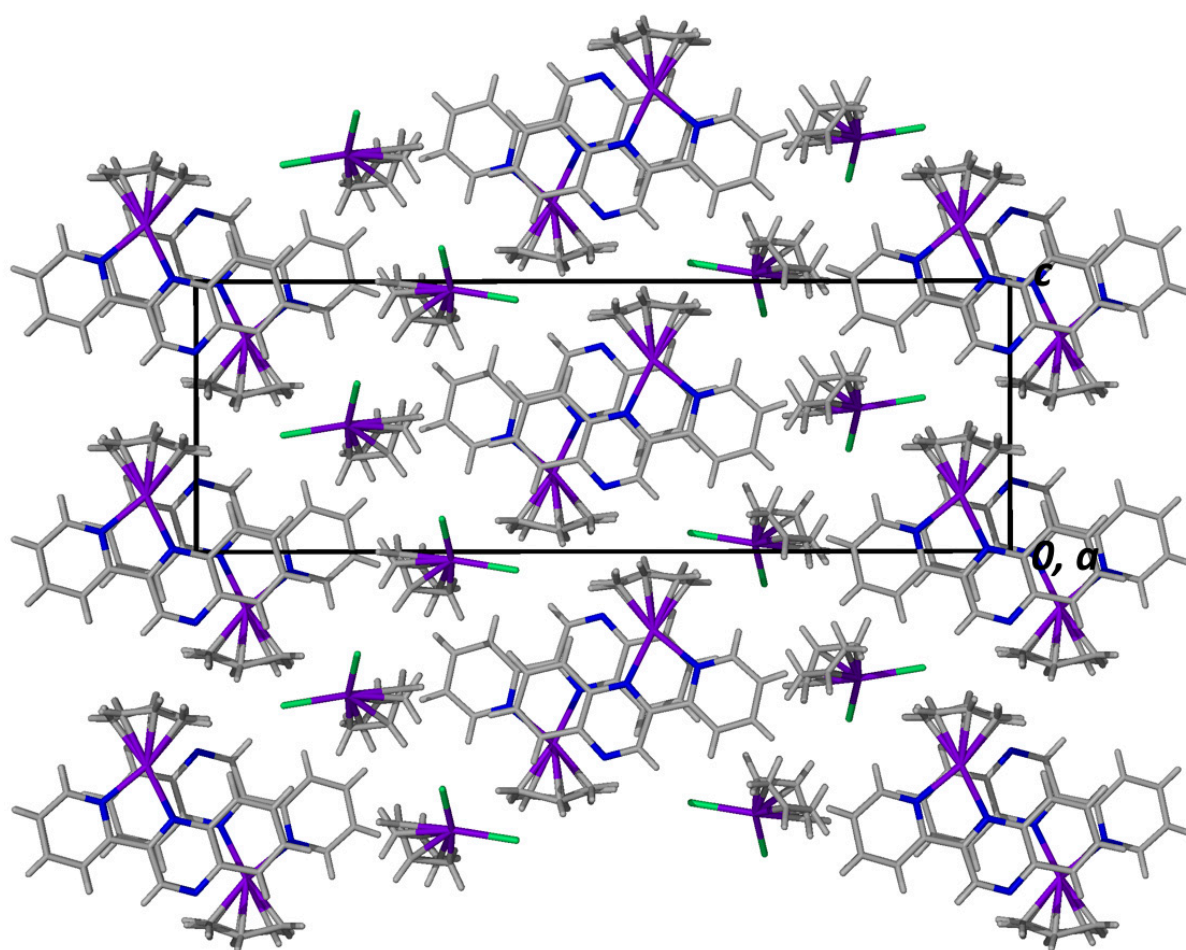

**Figure S19:** A packing diagram of compound  $[\text{Pd}(\eta^3\text{-allyl})(\text{pqx})][\text{Pd}(\eta^3\text{-allyl})\text{Cl}_2]$  (**6a**), down to the  $a$  axis of the unit cell.
